# Supplementary material for: Energy landscape differences among integrins establish the framework for understanding activation
Source: PubMed Central journal article supplement — J Cell Biol. 2018 Jan 2;217(1):397–412. doi: 10.1083/jcb.201701169 (PMC5748972; doi:10.1083/jcb.201701169), 2018-01-02
Supplement: JCB_201701169_sm.pdf [file JCB_201701169_sm.pdf]

Li and Springer, <https://doi.org/10.1083/jcb.201701169>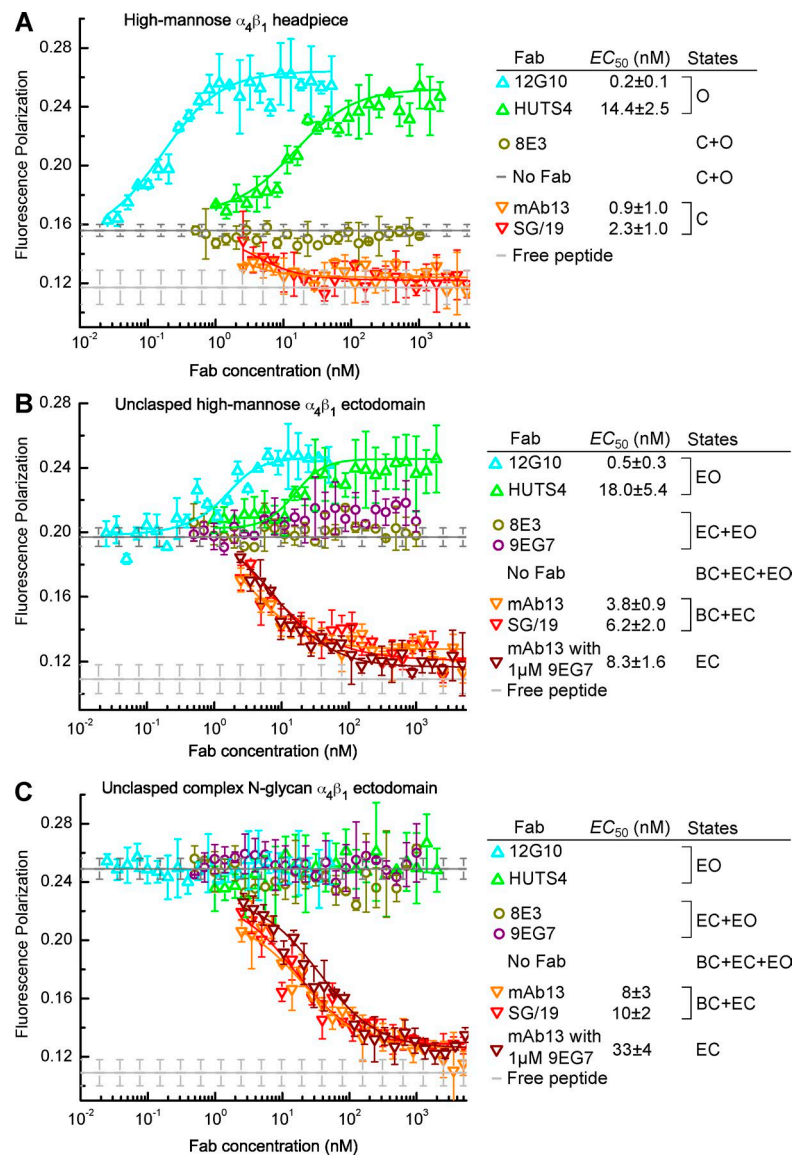

Figure S1.  $EC_{50}$  of conformation-specific Fabs for soluble  $\alpha_4\beta_1$  preparations. Fab titrations were done at 1 nM FITC-LDVP, 2 nM  $\alpha_4\beta_1$  high-mannose headpiece (A), 2 nM unclassified high-mannose ectodomain (B), and 2 nM unclassified complex N-glycan ectodomain (C).  $EC_{50}$  values were obtained from fitting the FP and Fab concentration data to Eq. S21. Errors are fitting errors from duplicates.

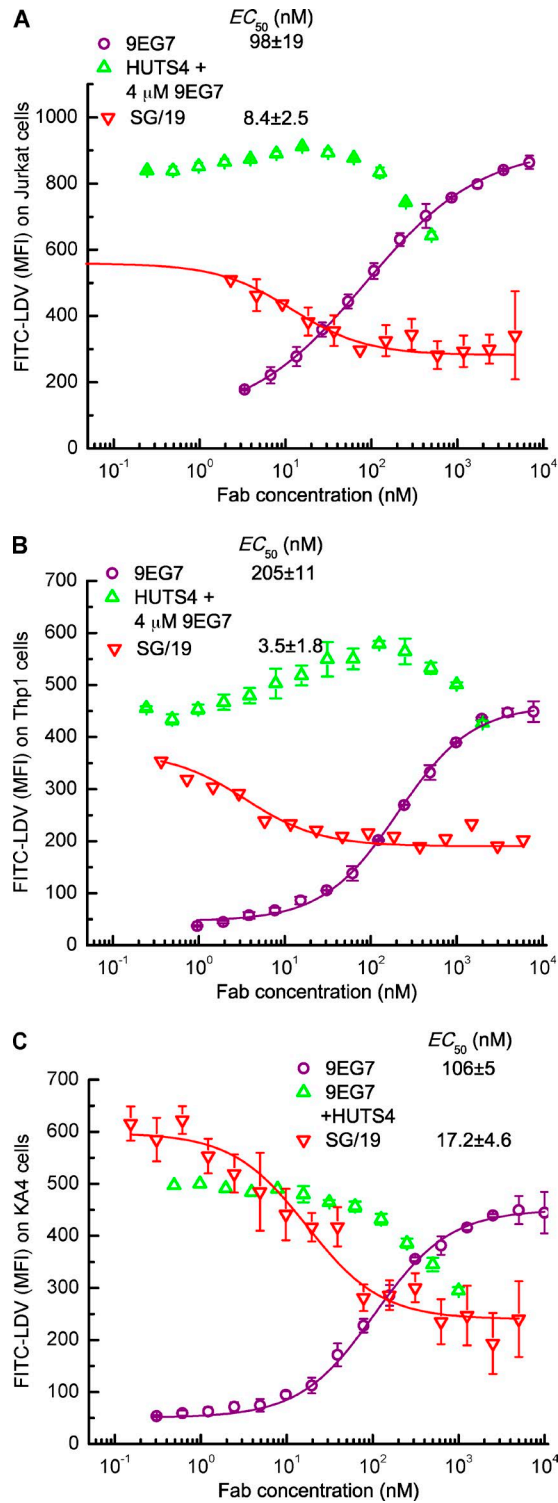

Figure S2.  $EC_{50}$  of conformation-specific Fabs for the intact  $\alpha 4\beta 1$  on cell surfaces. Fab titrations were done at 1 nM FITC-LDVP for open-stabilizing and extension-stabilizing Fabs, 30 nM for closure-stabilizing Fabs on Jurkat (A), Thp1 (B), and KA4 (C) cells.  $EC_{50}$  values were obtained from fitting the MFI and Fab concentration data to Eq. S22. Errors are fitting errors from duplicates.

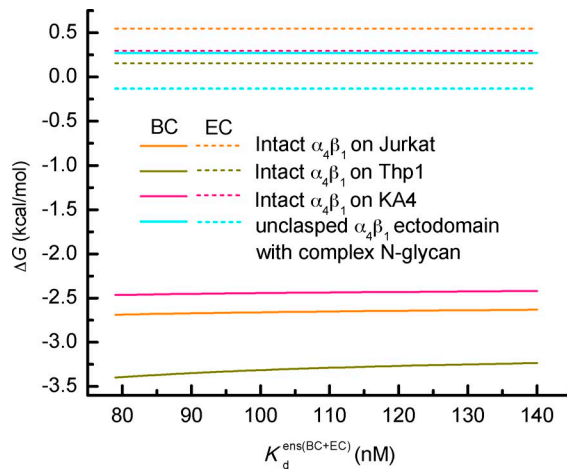

Figure S3. **Lack of sensitivity of the energy landscape on the ensemble affinity of the closed states.** Dependence of the stability of BC and EC conformation of the intact  $\alpha_4\beta_1$  on cell surfaces and the ectodomain construct on the ensemble affinity of the closed states were plotted according to Eqs. S17 and S18.

Table S1. Fab  $EC_{50}$  values, concentrations used in ligand-binding affinity measurements ( $[Fab]_{tot}$ ), and probabilities of Fab-bound integrins

|                                       | Fab                           | HUTS4       | 12G10     | 8E3             | 9EG7                | SG/19      | mAb13     | HUTS4 + 9EG7  | mAb13 + 9EG7    |
|---------------------------------------|-------------------------------|-------------|-----------|-----------------|---------------------|------------|-----------|---------------|-----------------|
|                                       | Stabilized states             | EO          | EO        | EC + EO         | EC + EO             | BC + EC    | BC + EC   | EO            | EC              |
| <b><math>\alpha_4\beta_1</math></b>   |                               |             |           |                 |                     |            |           |               |                 |
| High-mannose headpiece                | $EC_{50}$ (nM)                | 14.4 ± 2.5  | 0.2 ± 0.1 | ND <sup>a</sup> | Epitope not present | 2.3 ± 1.0  | 0.9 ± 1.0 | ND            | ND              |
|                                       | $[Fab]_{tot}$ (nM)            | 1,000       | Unused    | 1,000           | Epitope not present | 5,000      | 5,000     | Unused        | Unused          |
|                                       | $P_{\alpha_4\beta_1-Fab}$ (%) | 98.4        | NA        | NA              | Epitope not present | 99.9       | 100       | NA            | NA              |
| Unclassed complex N-glycan ectodomain | $EC_{50}$ (nM)                | ND          | ND        | ND              | ND                  | 10 ± 2     | 8 ± 3     | ND            | 33 ± 4          |
|                                       | $[Fab]_{tot}$ (nM)            | 1,000       | Unused    | 1,000           | Unused              | 5,000      | 5,000     | Unused        | 5,000 + 1,000   |
|                                       | $P_{\alpha_4\beta_1-Fab}$ (%) | >98.4       | NA        | >99.9           | NA                  | 99.8       | 99.8      | NA            | 99.3            |
| Unclassed high-mannose ectodomain     | $EC_{50}$ (nM)                | 18 ± 5.4    | 0.5 ± 0.3 | ND              | ND                  | 6.2 ± 2.0  | 3.8 ± 0.9 | ND            | 8.3 ± 1.6       |
|                                       | $[Fab]_{tot}$ (nM)            | 1,000       | 120       | 1,000           | 1,000               | 5,000      | 5,000     | Unused        | 5,000 + 1,000   |
|                                       | $P_{\alpha_4\beta_1-Fab}$ (%) | 98.0        | 97.6      | >99.9           | >99.9               | 99.9       | 99.9      | NA            | 99.8            |
| Intact receptor on Jurkat cells       | $EC_{50}$ (nM)                | ND          | ND        | ND              | 98 ± 19             | 8.4 ± 2.5  | ND        | ND            | ND              |
|                                       | $[Fab]_{tot}$ (nM)            | Unused      | Unused    | Unused          | 8,000               | 5,000      | Unused    | 15 + 4,000    | Unused          |
|                                       | $P_{\alpha_4\beta_1-Fab}$ (%) | NA          | NA        | NA              | 98.8                | 99.8       | ND        | ND            | NA              |
| Intact receptor on Thp1 cells         | $EC_{50}$ (nM)                | ND          | ND        | ND              | 205 ± 11            | 3.5 ± 1.8  | ND        | ND            | ND              |
|                                       | $[Fab]_{tot}$ (nM)            | Unused      | Unused    | Unused          | 8,000               | 5,000      | Unused    | 100 + 4,000   | Unused          |
|                                       | $P_{\alpha_4\beta_1-Fab}$ (%) | NA          | NA        | NA              | 97.5                | 99.9       | ND        | ND            | NA              |
| Intact receptor on KA4 cells          | $EC_{50}$ (nM)                | ND          | ND        | ND              | 106 ± 5             | 17.2 ± 4.6 | ND        | ND            | ND              |
|                                       | $[Fab]_{tot}$ (nM)            | Unused      | Unused    | Unused          | 8,000               | 10,000     | Unused    | 10 + 4,000    | Unused          |
|                                       | $P_{\alpha_4\beta_1-Fab}$ (%) | NA          | NA        | NA              | 98.7                | 99.8       | ND        | ND            | NA              |
| <b><math>\alpha_5\beta_1^b</math></b> |                               |             |           |                 |                     |            |           |               |                 |
| High-mannose headpiece                | $EC_{50}$ (nM)                | 2,800 ± 600 | 28 ± 3    | 4.3 ± 4.2       | Epitope not present | <4.7       | <2.3      | ND            | ND              |
|                                       | $[Fab]_{tot}$ (nM)            | Unused      | 2,000     | 20,000          | Epitope not present | 20,000     | 20,000    | Unused        | Unused          |
|                                       | $P_{\alpha_5\beta_1-Fab}$ (%) | NA          | 98.2      | 99.8            | Epitope not present | >99.8      | >99.9     | NA            | NA              |
| Unclassed complex N-glycan ectodomain | $EC_{50}$ (nM)                | <34         | ND        | <15             | ND                  | 6.9 ± 1.6  | ND        | ND            | ND              |
|                                       | $[Fab]_{tot}$ (nM)            | 5,000       | Unused    | 2,000           | Unused              | 10,000     | Unused    | Unused        | Unused          |
|                                       | $P_{\alpha_5\beta_1-Fab}$ (%) | >99.3       | NA        | >99.0           | NA                  | 99.8       | NA        | NA            | NA              |
| Unclassed high-mannose ectodomain     | $EC_{50}$ (nM)                | 20 ± 3      | 1.1 ± 0.2 | 9 ± 4           | 3.1 ± 1.4           | 4.7 ± 1.0  | 2.3 ± 1.0 | ND            | 1.8 ± 0.6       |
|                                       | $[Fab]_{tot}$ (nM)            | 5,000       | 1,000     | 2,000           | 2,000               | 10,000     | 15,000    | NA            | 15,000 + 10,000 |
|                                       | $P_{\alpha_5\beta_1-Fab}$ (%) | 99.6        | 99.8      | 99.4            | 99.8                | 99.9       | 99.9      | NA            | 99.9            |
| Intact receptor on K562 cells         | $EC_{50}$ (nM)                | 2,900 ± 300 | 107 ± 5   | ND              | 690 ± 30            | ND         | ND        | 21 ± 2        | ND              |
|                                       | $[Fab]_{tot}$ (nM)            | Unused      | 2,000     | Unused          | 13,000              | Unused     | Unused    | 2,000 + 6,000 | Unused          |
|                                       | $P_{\alpha_5\beta_1-Fab}$ (%) | NA          | 95.0      | NA              | 95.0                | NA         | NA        | 99.0          | NA              |

<sup>a</sup>ND, not determined or titration data not fittable; NA, not applicable.

<sup>b</sup>Data published in Li et al. (2017), Fab concentrations used on Jurkat, Thp1, and KA4 to stabilize certain conformational states, are the same as those listed here for K562 cells.

## References

Li, J., Y. Su, W. Xia, Y. Qin, M.J. Humphries, D. Vestweber, C. Cabañas, C. Lu, and T.A. Springer. 2017. Conformational equilibria and intrinsic affinities define integrin activation. *EMBO J.* 36:629–645. <https://doi.org/10.15252/embj.201695803>
